# Supplementary material for: Resistance Status to the Insecticides Temephos, Deltamethrin, and Diflubenzuron in BrazilianAedes aegyptiPopulations
Source: Hindawi journal article supplement (doi:10.1155/2016/8603263), 2016-01-01
Supplement: f1 [file 8603263.f1.pdf]

**Table S1:** incidence of reported dengue cases in the municipalities evaluated from 2008 to 2012 and in the corresponding States (in grey). Values refer to the rate of notified cases per 100.000 inhabitants.

| Region | State | Locality                | 2008         | 2009         | 2010         | 2011         | 2012         |
|--------|-------|-------------------------|--------------|--------------|--------------|--------------|--------------|
| N      | RR    |                         | <b>1,194</b> | <b>756</b>   | <b>1,685</b> | <b>322</b>   | <b>399</b>   |
|        |       | Pacaraima               | <b>700</b>   | <b>374</b>   | <b>1,074</b> | <b>460</b>   | <b>939</b>   |
|        | PA    |                         | 211          | 103          | 205          | 254          | 208          |
|        |       | Castanhal               | 131          | 95           | 131          | 76           | <b>1,588</b> |
|        |       | Marabá                  | 252          | 106          | 129          | 214          | 141          |
| NE     | RN    |                         | <b>918</b>   | 81           | 248          | <b>731</b>   | <b>892</b>   |
|        |       | Caicó                   | 217          | 6            | 108          | 234          | <b>506</b>   |
| SE     | ES    |                         | <b>756</b>   | <b>767</b>   | <b>742</b>   | <b>1,148</b> | <b>334</b>   |
|        |       | Cachoeiro de Itapemirim | <b>3,271</b> | 7            | <b>798</b>   | <b>775</b>   | <b>320</b>   |
|        |       |                         | <b>609</b>   | <b>646</b>   | <b>1,700</b> | <b>566</b>   | <b>398</b>   |
| CO     | GO    | Aparecida de Goiânia    | <b>1,293</b> | <b>1,821</b> | <b>2,138</b> | <b>1,169</b> | <b>1,536</b> |
| CO     |       | Campos Belos            | 217          | <b>1,505</b> | 4,356        | 92           | 5            |
| CO     |       | Goiânia                 | <b>1,529</b> | <b>1,841</b> | <b>3,217</b> | <b>470</b>   | <b>781</b>   |
| CO     |       | Rio Verde               | <b>763</b>   | 184          | <b>1,721</b> | 249          | <b>321</b>   |
| CO     |       | São Miguel do Araguaia  | <b>332</b>   | <b>1,414</b> | <b>574</b>   | 117          | 94           |
| CO     |       | São Simão               | 12           | <b>1,375</b> | <b>2,382</b> | 99           | 59           |
| CO     |       | Uruaçu                  | 62           | <b>1,595</b> | 141          | 111          | 76           |

Available at [<http://www.censo2010.ibge.gov.br/sinopse/index.php?uf=14&dados=21>], accessed at 3rd Aug 2015.

Bold: values above 300, a high incidence rate according to the Brazilian Ministry of Health

**Table S2:** temephos lethal concentrations (LC) and diflubenzuron adult emergence inhibition doses (EI) of several Brazilian municipalities.

| year | Region | State | Municipality/strain     | temephos                |                         |                         |                         | diflubenzuron           |                         |                         |                         |
|------|--------|-------|-------------------------|-------------------------|-------------------------|-------------------------|-------------------------|-------------------------|-------------------------|-------------------------|-------------------------|
|      |        |       |                         | LC <sub>50</sub> (µg/L) | LC <sub>95</sub> (µg/L) | range                   |                         | EI <sub>50</sub> (µg/L) | EI <sub>95</sub> (µg/L) | range                   |                         |
|      |        |       |                         |                         |                         | LC <sub>50</sub> (µg/L) | LC <sub>95</sub> (µg/L) |                         |                         | EI <sub>50</sub> (µg/L) | EI <sub>95</sub> (µg/L) |
| 2010 | NE     | RN    | Rockefeller             | 2.89                    | 5.33                    | 2.80 < LC < 2.98        | 5.17 < LC < 5.50        | 1.101                   | 1.900*                  | 1.047 < LC < 1.176      | 1.805 < LC < 1.999*     |
|      |        |       | Caicó                   | 24.31                   | 51.31                   | 23.68 < LC < 24.95      | 48.94 < LC < 53.80      | 2.444                   | 3.283*                  | 2.362 < LC < 2.528      | 3.119 < LC < 3.456*     |
| 2011 | N      | RR    | Rockefeller             | 3.56                    | 7.56                    | 3.31 < LC < 3.82        | 6.75 < LC < 8.46        | 0.970                   | 2.410                   | 0.918 < LC < 1.025      | 2.256 < LC < 2.574      |
|      |        |       | Pacaraima               | 15.38                   | 29.91                   | 13.49 < LC < 17.54      | 25.42 < LC < 35.19      | 1.695                   | 3.591                   | 1.608 < LC < 1.788      | 3.307 < LC < 3.898      |
|      |        | PA    | Castanhal               | 29.03                   | 85.01                   | 25.18 < LC < 33.47      | 67.00 < LC < 107.85     | 1.312                   | 2.912                   | 1.239 < LC < 1.389      | 2.662 < LC < 3.184      |
|      |        |       | Marabá                  | 28.45                   | 77.80                   | 25.62 < LC < 31.59      | 66.28 < LC < 91.31      | 1.791                   | 3.874                   | 1.708 < LC < 1.878      | 3.561 < LC < 4.213      |
|      | SE     | ES    | Cachoeiro de Itapemirim | 65.49                   | 129.35                  | 61.86 < LC < 69.33      | 118.68 < LC < 140.97    | 1.846                   | 3.921                   | 1.757 < LC < 1.940      | 3.639 < LC < 4.224      |
|      |        |       | Campos Belos            | 32.47                   | 90.87                   | 30.12 < LC < 35.00      | 78.91 < LC < 104.65     | 1.654                   | 3.924                   | 1.568 < LC < 1.744      | 3.530 < LC < 4.362      |
|      | CW     | GO    | Goiânia                 | 28.25                   | 64.83                   | 25.83 < LC < 30.90      | 55.50 < LC < 75.73      | 1.509                   | 4.285                   | 1.414 < LC < 1.610      | 3.754 < LC < 4.891      |
|      |        |       | Rio Verde               | 40.99                   | 112.06                  | 37.04 < LC < 45.36      | 96.92 < LC < 129.57     | 1.914                   | 3.902                   | 1.830 < LC < 2.002      | 3.573 < LC < 4.262      |
|      |        |       | São Simão               | 43.13                   | 111.77                  | 37.50 < LC < 49.68      | 92.73 < LC < 134.71     | 1.953                   | 5.637                   | 1.851 < LC < 2.061      | 5.019 < LC < 6.331      |
| 2012 | CW     | GO    | Uruaçu                  | 37.37                   | 94.53                   | 32.88 < LC < 42.46      | 79.93 < LC < 111.81     | 1.877                   | 3.615                   | 1.799 < LC < 1.958      | 3.335 < LC < 3.919      |
|      |        |       | Aparecida de Goiânia    | 63.68                   | 125.36                  | 60.03 < LC < 67.54      | 115.45 < LC < 136.12    | 1.069                   | 5.078                   | 0.967 < LC < 1.181      | 4.201 < LC < 6.137      |
|      |        |       | São Miguel do Araguaia  | 75.05                   | 205.21                  | 68.19 < LC < 82.59      | 175.02 < LC < 240.61    | 1.508                   | 4.067                   | 1.417 < LC < 1.605      | 3.597 < LC < 4.599      |

\* EI<sub>80</sub> is informed

**Table S3:** deltamethrin lethal concentrations (LC) and *kdr* frequencies of several Brazilian municipalities. *Kdr* data source: Linss *et al* 2014.

| year | Region | State | Municipality/strain     | Deltamethrin            |                         |                         |                         |                         |                         | generation | sample size | 1016Ile frequency | 1534Cys frequency | Na <sub>v</sub> allelic frequencies |       |       |
|------|--------|-------|-------------------------|-------------------------|-------------------------|-------------------------|-------------------------|-------------------------|-------------------------|------------|-------------|-------------------|-------------------|-------------------------------------|-------|-------|
|      |        |       |                         | LC <sub>50</sub> (mg/L) | LC <sub>80</sub> (mg/L) | LC <sub>95</sub> (mg/L) | range                   |                         | LC <sub>95</sub> (mg/L) |            |             |                   |                   | S                                   | R1    | R2    |
|      |        |       |                         | LC <sub>50</sub> (mg/L) | LC <sub>80</sub> (mg/L) | LC <sub>95</sub> (mg/L) | LC <sub>80</sub> (mg/L) | LC <sub>95</sub> (mg/L) |                         |            |             |                   |                   |                                     |       |       |
| 2010 | NE     | RN    | Rockefeller             | 0.70                    |                         | 1.45                    | 0.70 < LC < 0.81        |                         | 2.36 < LC < 3.13        | F1         | 30          | 0.017             | 0.084             | 0.917                               | 0.067 | 0.017 |
|      |        |       | Caicó                   | 4.22                    |                         | 19.04                   | 3.62 < LC < 4.92        | 15.32 < LC < 23.67      |                         |            |             |                   |                   |                                     |       |       |
| 2011 | N      | RR    | Rockefeller             | 0.92                    | 1.41                    | 2.12                    | 0.84 < LC < 1.01        | 1.30 < LC < 1.54        | 1.87 < LC < 2.41        | F0         | 30          | 0.400             | 1.000             | 0.000                               | 0.600 | 0.400 |
|      |        |       | Pacaraima               | 30.61                   |                         | 127.89                  | 25.96 < LC < 36.10      | 100.19 < LC < 163.25    |                         |            |             |                   |                   |                                     |       |       |
|      |        | PA    | Castanhal               | 9.12                    |                         | 31.52                   | 8.03 < LC < 10.35       |                         | 26.97 < LC < 36.86      | F0         | 30          | 0.033             | 0.333             | 0.667                               | 0.300 | 0.033 |
|      |        |       | Marabá                  | 43.72                   |                         | 149.97                  | 38.73 < LC < 49.36      | 115.85 < LC < 194.16    |                         |            |             |                   |                   |                                     |       |       |
|      | SE     | ES    | Cachoeiro de Itapemirim | 45.19                   | 110.98                  |                         | 41.61 < LC < 49.10      | 96.72 < LC < 127.37     | 82.69 < LC < 148.58     | F0         | 29          | 0.672             | 0.896             | 0.103                               | 0.224 | 0.672 |
|      |        |       | Campos Belos            | 23.37                   |                         | 110.84                  | 17.96 < LC < 30.42      |                         | 82.69 < LC < 148.58     |            |             |                   |                   |                                     |       |       |
|      | CW     | GO    | Goiânia                 | 43.88                   |                         | 98.57                   | 41.23 < LC < 46.70      |                         | 89.75 < LC < 108.27     | F0         | 29          | 0.552             | 0.759             | 0.241                               | 0.207 | 0.552 |
|      |        |       | Rio Verde               | 30.01                   |                         | 119.29                  | 25.35 < LC < 35.51      |                         | 94.31 < LC < 150.89     |            |             |                   |                   |                                     |       |       |
|      |        |       | São Simão               | 28.08                   |                         | 109.52                  | 25.53 < LC < 33.52      |                         | 87.71 < LC < 136.77     |            |             |                   |                   |                                     |       |       |
|      |        |       | Uruaçu                  | 35.64                   |                         | 109.54                  | 32.36 < LC < 39.24      |                         | 97.18 < LC < 123.49     |            |             |                   |                   |                                     |       |       |
| 2012 | CW     | GO    | Aparecida de Goiânia    | 30.48                   |                         | 121.39                  | 27.17 < LC < 34.19      |                         | 103.05 < LC < 143.00    | F0         | 29          | 0.4631            | 0.825             | 0.207                               | 0.362 | 0.463 |
|      |        |       | São Miguel do Araguaia  | 36.51                   |                         | 104.87                  | 34.26 < LC < 38.90      |                         | 95.79 < LC < 114.81     | F0         | 29          | 0.293             | 0.586             | 0.414                               | 0.293 | 0.293 |

\* RR<sub>80</sub> is informed.

Alleles S, R1 and R2 refer to the positions 1016 and 1534 of the gene coding for the voltage gated sodium channel (Nav) as follows: S = 1016 Val+ / 1534 Phe+ ; R1 = 1016 Val+ / 1534 Cyskdr ; R2 = 1016 Ilekdr / 1534 Cyskdr.

Table S4: details of the of the enzymatic activity quantification in Brazilian *Aedes aegypti* larvae populations. Colors as in Table 3 and 4.

| year | Region | State | Municipality/strain    | generation | ACE (Abs/hour/ptn mg) |      |          |              | MFO (nmoles cit/ptn mg) |       |          |              | GST (mmol/min/ptn mg) |      |          |              | α-Est (nmol/ptn mg/min) |       |          |              | β-Est (nmol/ptn mg/min) |       |          |              | ρ npa-Est (D Abs/min/ptn mg) |      |          |              |
|------|--------|-------|------------------------|------------|-----------------------|------|----------|--------------|-------------------------|-------|----------|--------------|-----------------------|------|----------|--------------|-------------------------|-------|----------|--------------|-------------------------|-------|----------|--------------|------------------------------|------|----------|--------------|
|      |        |       |                        |            | n                     | med  | p99 Rock | % > p99 Rock | n                       | med   | p99 Rock | % > p99 Rock | n                     | med  | p99 Rock | % > p99 Rock | n                       | med   | p99 Rock | % > p99 Rock | n                       | med   | p99 Rock | % > p99 Rock | n                            | med  | p99 Rock | % > p99 Rock |
| 2010 | NE     | RN    | Rockefeller            | F2         | 256                   | 0.04 | 0.14     |              | 268                     | 40.88 | 78.41    |              | 265                   | 0.38 | 1.10     |              | 268                     | 17.06 | 62.02    |              | 268                     | 29.65 | 82.75    |              | 249                          | 3.02 | 5.46     |              |
|      |        |       | Caicó                  |            | 83                    | 0.03 |          | 0            | 83                      | 38.50 |          | 4            | 83                    | 0.78 |          | 19           | 55                      | 22.41 |          | 0            | 55                      | 30.05 |          | 0            | 54                           | 2.62 |          | 0            |
| 2011 | N      | PA    | Rockefeller            | F2         | 179                   | 0.05 | 0.09     |              | 172                     | 35.57 | 67.48    |              | 153                   | 0.47 | 0.94     |              | 178                     | 13.67 | 22.24    |              | 163                     | 19.56 | 31.19    |              | 173                          | 2.47 | 4.19     |              |
|      |        |       | Pacaraima              |            | 80                    | 0.06 |          | 6            | 79                      | 34.56 |          | 1            | 78                    | 0.57 |          | 21           | 80                      | 12.09 |          | 0            | 80                      | 21.66 |          | 14           | 77                           | 1.99 |          | 3            |
|      |        |       | Castanhal              |            | 80                    | 0.04 |          | 0            | 80                      | 65.12 |          | 48           | 80                    | 0.76 |          | 34           | 80                      | 15.33 |          | 3            | 80                      | 27.69 |          | 29           | 80                           | 5.29 |          | 75           |
|      | CO     | GO    | Campos Belos           | F2         | 79                    | 0.05 |          | 1            | 79                      | 26.32 |          | 15           | 77                    | 0.50 |          | 9            | 79                      | 13.73 |          | 1            | 79                      | 22.46 |          | 5            | 72                           | 1.86 |          | 0            |
|      |        |       | Goiânia                | F2         | 80                    | 0.06 |          | 3            | 80                      | 40.18 |          | 6            | 80                    | 0.93 |          | 49           | 80                      | 16.39 |          | 5            | 80                      | 28.38 |          | 34           | 80                           | 3.75 |          | 36           |
|      |        |       | Rio Verde              | F2         | 81                    | 0.05 |          | 1            | 81                      | 25.63 |          | 0            | 81                    | 0.75 |          | 40           | 81                      | 18.68 |          | 19           | 81                      | 29.54 |          | 38           | 78                           | 2.41 |          | 8            |
| 2012 | CO     | GO    | São Simão              | F2         | 78                    | 0.06 |          | 1            | 80                      | 36.84 |          | 4            | 80                    | 0.87 |          | 40           | 79                      | 18.98 |          | 35           | 80                      | 27.41 |          | 33           | 77                           | 3.47 |          | 32           |
|      |        |       | Aparecida de Goiânia   | F1         | 80                    | 0.06 |          | 5            | 80                      | 53.97 |          | 31           | 80                    | 1.28 |          | 85           | 80                      | 16.05 |          | 8            | 80                      | 31.91 |          | 54           | 80                           | 4.40 |          | 63           |
|      |        |       | São Miguel do Araguaia | F1         | 80                    | 0.04 |          | 0            | 80                      | 30.76 |          | 0            | 80                    | 0.73 |          | 20           | 80                      | 19.41 |          | 28           | 80                      | 26.44 |          | 21           | 80                           | 4.58 |          | 59           |

The Rockefeller values used to calibrate each group of assays are shown above the municipalities. (n) Number of specimens evaluated. (med) Median of each enzymatic activity. (p99 Rock) 99 percentil for Rockefeller strain. (%>p99Rock) Rate of the population with activity higher than the Rockefeller 99 percentil.

Table S5: details of the of the enzymatic activity quantification in Brazilian *Aedes aegypti* adult populations. Colors as in Table 3 and 4.

| year | Region | State | Municipality/strain     | generation | ACE (Abs/hour/ptn mg) |      |          |              | MFO (nmoles cit/ptn mg) |                  |                       |                           | GST (mmol/min/ptn mg) |      |          |              | α-Est (nmol/ptn mg/min) |      |          |              | β-Est (nmol/ptn mg/min) |      |          |              | ρ npa-Est (D Abs/min/ptn mg) |      |          |              |
|------|--------|-------|-------------------------|------------|-----------------------|------|----------|--------------|-------------------------|------------------|-----------------------|---------------------------|-----------------------|------|----------|--------------|-------------------------|------|----------|--------------|-------------------------|------|----------|--------------|------------------------------|------|----------|--------------|
|      |        |       |                         |            | n                     | med  | p99 Rock | % > p99 Rock | n <sup>1</sup>          | med <sup>2</sup> | p99 Rock <sup>3</sup> | % > p99 Rock <sup>4</sup> | n                     | med  | p99 Rock | % > p99 Rock | n                       | med  | p99 Rock | % > p99 Rock | n                       | med  | p99 Rock | % > p99 Rock | n                            | med  | p99 Rock | % > p99 Rock |
| 2010 | NE     | RN    | Rockefeller             | F2         | 132                   | 0.08 | 0.12     |              | 122                     | 23.89            | 44.02                 |                           | 124                   | 0.95 | 1.45     |              | 129                     | 4.77 | 6.32     |              | 131                     | 5.96 | 9.00     |              | 98                           | 3.24 | 6.42     |              |
|      |        |       | Caicó                   |            | 71                    | 0.08 |          | 3            | 96                      | 26.41            |                       | 0                         | 93                    | 1.13 |          | 11           | 100                     | 6.62 |          | 63           | 109                     | 5.70 |          | 22           | 97                           | 3.30 |          | 6            |
| 2011 | N      | RR    | Rockefeller             | F2         | 155                   | 0.12 | 0.22     |              | 137                     | 28.05            | 44.97                 |                           | 100                   | 0.66 | 1.07     |              | 154                     | 5.49 | 7.58     |              | 153                     | 6.33 | 10.77    |              | 83                           | 3.20 | 6.39     |              |
|      |        |       | Pacaraima               |            | 80                    | 0.17 |          | 0            | 77                      | 38.59            |                       | 17                        | 60                    | 1.00 |          | 40           | 80                      | 7.52 |          | 48           | 80                      | 8.61 |          | 13           | 65                           | 4.26 |          | 2            |
|      |        |       | Cachoeiro de Itapemirim |            | 80                    | 0.12 |          | 0            | 79                      | 54.8             |                       | 80                        | 80                    | 1.60 |          | 98           | 79                      | 8.12 |          | 67           | 80                      | 7.43 |          | 3            | 73                           | 7.71 |          | 70           |
|      | CO     | GO    | Campos Belos            | F2         | 80                    | 0.15 |          | 0            | 80                      | 28.64            |                       | 8                         | 78                    | 1.22 |          | 65           | 80                      | 6.45 |          | 14           | 80                      | 6.25 |          | 1            | 64                           | 4.58 |          | 6            |
|      |        |       | Goiânia                 | F2         | 80                    | 0.16 |          | 0            | 78                      | 70.3             |                       | 99                        | 79                    | 1.25 |          | 78           | 80                      | 7.90 |          | 55           | 80                      | 7.72 |          | 5            | 78                           | 6.23 |          | 38           |
|      |        |       | Rio Verde               | F2         | 80                    | 0.18 |          | 13           | 78                      | 48.27            |                       | 74                        | 45                    | 0.64 |          | 4            | 80                      | 8.98 |          | 81           | 79                      | 7.85 |          | 8            | 75                           | 3.76 |          | 13           |
| 2012 | CO     | GO    | São Simão               | F2         | 80                    | 0.18 |          | 21           | 78                      | 30.98            |                       | 9                         | 54                    | 1.12 |          | 59           | 80                      | 8.03 |          | 58           | 80                      | 6.98 |          | 14           | 67                           | 5.04 |          | 15           |
|      |        |       | Aparecida de Goiânia    | F1         | 80                    | 0.13 |          | 1            | 77                      | 63.42            |                       | 57                        | 68                    | 1.58 |          | 94           | 80                      | 8.54 |          | 70           | 80                      | 8.12 |          | 10           | 79                           | 7.40 |          | 73           |
|      |        |       | São Miguel do Araguaia  | F1         | 80                    | 0.18 |          | 4            | 78                      | 62.41            |                       | 97                        | 52                    | 0.78 |          | 8            | 80                      | 7.50 |          | 46           | 79                      | 6.55 |          | 0            | 79                           | 4.80 |          | 8            |

The Rockefeller values used to calibrate each group of assays are shown above the municipalities. (n) Number of specimens evaluated. (med) Median of each enzymatic activity (p99 Rock) 99 percentil for Rockefeller strain. (%>p99Rock) Rate of the population with activity higher than the Rockefeller 99 percentil.
